# Supplementary material for: A Biological Signature for Breast Ductal Carcinoma In Situ to Predict Radiotherapy Benefit and Assess Recurrence Risk
Source: Oxford University Press journal article supplement (doi:10.1158/1078-0432.ccr-18-0842), 2018-07-27
Supplement: 10780432ccr180842-sup-198569_2_supp_4890594_pc0w2b.docx [file 10780432ccr180842-sup-198569_2_supp_4890594_pc0w2b.docx]

| **Table S1.** Biomarker Assay Methodology | | | | | | |
| --- | --- | --- | --- | --- | --- | --- |
|  |  |  |  |  |  |  |
|  |  | PreludeDx Antibodies | |  | Candidate Antibodies | |
| **Target** | **Scoring Method** | **Clone** | **Manufacturer** |  | **Clone** | **Manufacturer** |
| PR | CAP/ASCO | 16 | Leica |  | NCL-1A6 | Novacastra |
| HER2 | CAP/ASCO | SP3 | Cell Marque |  | A0485 | Dako |
| Ki-67 | % cells staining positive | MIB-1 | Dako |  | MIB-1 | Immunotech |
| COX-2 | Allred | SP21 | Cell Marque |  | SP21 | Lab Vision |
| FOXA1 | Percentage & intensity | 2F83 | Cell Marque |  | 2F83 | Abcam |
| p16/INK4A | Percentage & intensity | E6H4 | Ventana |  | E6H4 | Ventana/MTM |
| SIAH2 | % cells staining positive | HC/LC C39S | Cell Marque |  | 24E6H3 | Custom |
|  |  |  |  |  |  |  |
