# Supplementary material for: A Biological Signature for Breast Ductal Carcinoma In Situ to Predict Radiotherapy Benefit and Assess Recurrence Risk
Source: Oxford University Press journal article supplement (doi:10.1158/1078-0432.ccr-18-0842), 2018-07-27
Supplement: 10780432ccr180842-sup-198569_2_supp_4890595_pc0w2m.docx [file 10780432ccr180842-sup-198569_2_supp_4890595_pc0w2m.docx]

|  | **Table S2.** Multivariate Cox Proportional Hazards Analysis of DS, RT and Study Site by Risk Groups | | | | | | | | |  |
| --- | --- | --- | --- | --- | --- | --- | --- | --- | --- | --- |
|  |  | **Invasive Breast Cancer** (10-Yr IBC, 28 events) | | |  | **Ipsilateral Breast Event**  (10-Yr IBE, 57 events) | | |  |  |
|  | (excludes margin positive patients) | HR | 95%CI | p-value |  | HR | 95%CI | p-value |  |  |
|  |  |  |  |  |  |  |  |  |  |  |
|  | DS (per 5 units) | 3.1 | 1.4-6.5 | **0.004** |  | 2.4 | 1.4-4.1 | **0.001** |  |  |
|  | RT, Low Risk (DS≤3) | 0.6 | 0.2-2.3 | 0.444 |  | 0.6 | 0.3-1.5 | 0.305 |  |  |
|  | RT, Elevated Risk (DS>3), UUH | 0.3 | 0.1-0.9 | **0.029** |  | 0.3 | 0.1-0.7 | **0.004** |  |  |
|  | RT, Elevated Risk (DS>3), UMass | 0.2 | 0.03-0.7 | **0.018** |  | 0.2 | 0.1-0.6 | **0.005** |  |  |
|  | Diagnosis Year >1995 | 0.7 | 0.3-1.6 | 0.382 |  | 0.5 | 0.3-0.9 | **0.027** |  |  |
|  |  |  |  |  |  |  |  |  |  |  |
|  | A multivariate Cox proportional hazards analysis was performed with DS, RT as a function of DS and study site, and Year of Diagnosis, excluding margin positive patients (n=474). Abbreviations: 95%CI = 95% Confidence Interval; DS = Decision Score; RT = Radiation therapy; HR = Hazard Ratio; UMass = University of Massachusetts; UUH = Uppsala University Hospital. | | | | | | | | |  |
|  |  |  |  |  |  |  |  |  |  |  |
