# Supplementary material for: A Biological Signature for Breast Ductal Carcinoma In Situ to Predict Radiotherapy Benefit and Assess Recurrence Risk
Source: Oxford University Press journal article supplement (doi:10.1158/1078-0432.ccr-18-0842), 2018-07-27
Supplement: 10780432ccr180842-sup-198569_2_supp_4890596_pc0w2y.docx [file 10780432ccr180842-sup-198569_2_supp_4890596_pc0w2y.docx]

|  | **Table S3.** Clinicopathologic Features by Treatment & Risk Group (margin negative) | | | | | | | | | | | | |  |
| --- | --- | --- | --- | --- | --- | --- | --- | --- | --- | --- | --- | --- | --- | --- |
|  |  |  | **Low Risk** (DS≤3) | | | | |  | **Elevated Risk** (DS>3) | | | | |  |
|  |  |  |  |  | **BCS** |  | **BCS+RT** |  |  |  | **BCS** |  | **BCS+RT** |  |
|  | **Characteristic** | | **n** |  | **%** |  | **%** |  | **n** |  | **%** |  | **%** |  |
|  | **Age** |  |  |  |  |  |  |  |  |  |  |  |  |  |
|  |  | <50 | 51 |  | 29% |  | 71% |  | 80 |  | 30% |  | 70% |  |
|  |  | ≥50 | 145 |  | 48% |  | 52% |  | 198 |  | 44% |  | 56% |  |
|  | **Size (mm)** |  |  |  |  |  |  |  |  |  |  |  |  |  |
|  |  | <10 | 109 |  | 47% |  | 53% |  | 117 |  | 38% |  | 62% |  |
|  |  | ≥10 | 63 |  | 30% |  | 70% |  | 114 |  | 41% |  | 59% |  |
|  |  | Unknown | 24 |  | 58% |  | 42% |  | 47 |  | 43% |  | 57% |  |
|  | **Grade** |  |  |  |  |  |  |  |  |  |  |  |  |  |
|  |  | I (low) or II (int.) | 123 |  | 50% |  | 50% |  | 142 |  | 50% |  | 50% |  |
|  |  | III (high) | 62 |  | 26% |  | 74% |  | 127 |  | 30% |  | 70% |  |
|  |  | Unknown | 11 |  | 55% |  | 45% |  | 9 |  | 33% |  | 67% |  |
|  |  |  |  |  |  |  |  |  |  |  |  |  |  |  |
