# Supplementary material for: A Biological Signature for Breast Ductal Carcinoma In Situ to Predict Radiotherapy Benefit and Assess Recurrence Risk
Source: Oxford University Press journal article supplement (doi:10.1158/1078-0432.ccr-18-0842), 2018-07-27
Supplement: 10780432ccr180842-sup-198569_2_supp_4890598_pc0w3k.docx [file 10780432ccr180842-sup-198569_2_supp_4890598_pc0w3k.docx]

|  | **Table S5.** DS Group Classification within Select Clinicopathologic Factors | | | | | | |  |
| --- | --- | --- | --- | --- | --- | --- | --- | --- |
|  |  | **Clinicopathologic Factor(s)** | **Low Risk Group  (DS≤3)** | |  | **Elevated Risk Group  (DS>3)** | |  |
|  |  | (excludes margin positive patients) | **%** | **n** |  | **%** | **n** |  |
|  | **Grade** |  |  |  |  |  |  |  |
|  |  | I (low) | 55% | 29 |  | 45% | 24 |  |
|  |  | II (intermediate) | 45% | 81 |  | 55% | 99 |  |
|  |  | III (high) | 34% | 56 |  | 66% | 111 |  |
|  | **Size** |  |  |  |  |  |  |  |
|  |  | < 1 cm | 58% | 28 |  | 42% | 20 |  |
|  |  | ≥ 1 cm to < 2.5 cm | 52% | 78 |  | 48% | 72 |  |
|  |  | ≥ 2.5 cm | 30% | 60 |  | 70% | 142 |  |
|  | **Grade & Size** |  |  |  |  |  |  |  |
|  |  | Grade I or II & Size < 1 cm | 64% | 23 |  | 36% | 13 |  |
|  |  | Grade I or II & Size ≥ 1 cm to <2.5 cm | 57% | 56 |  | 43% | 42 |  |
|  |  | Grade III or Size ≥ 2.5 cm | 33% | 87 |  | 67% | 179 |  |
|  | DS Groups were used to stratify patients within clinicopathologic factors to show the number and percentage of patients at low and elevated risks, excluding margin positive patients (n=474). Abbreviations: Grade = Nuclear Grade; DS = Decision Score | | | | | | |  |
